# Supplementary material for: A cross‐sectional study of patients referred for HNF1B‐MODY genetic testing due to cystic kidneys and diabetes
Source: PubMed Central journal article supplement — Pediatr Diabetes. 2020 Jan 29;21(3):422–30. doi: 10.1111/pedi.12959 (PMC7217165; doi:10.1111/pedi.12959), 2020-01-29
Supplement: PEDI-21-422-s001.pdf [file PEDI-21-422-s001.pdf]

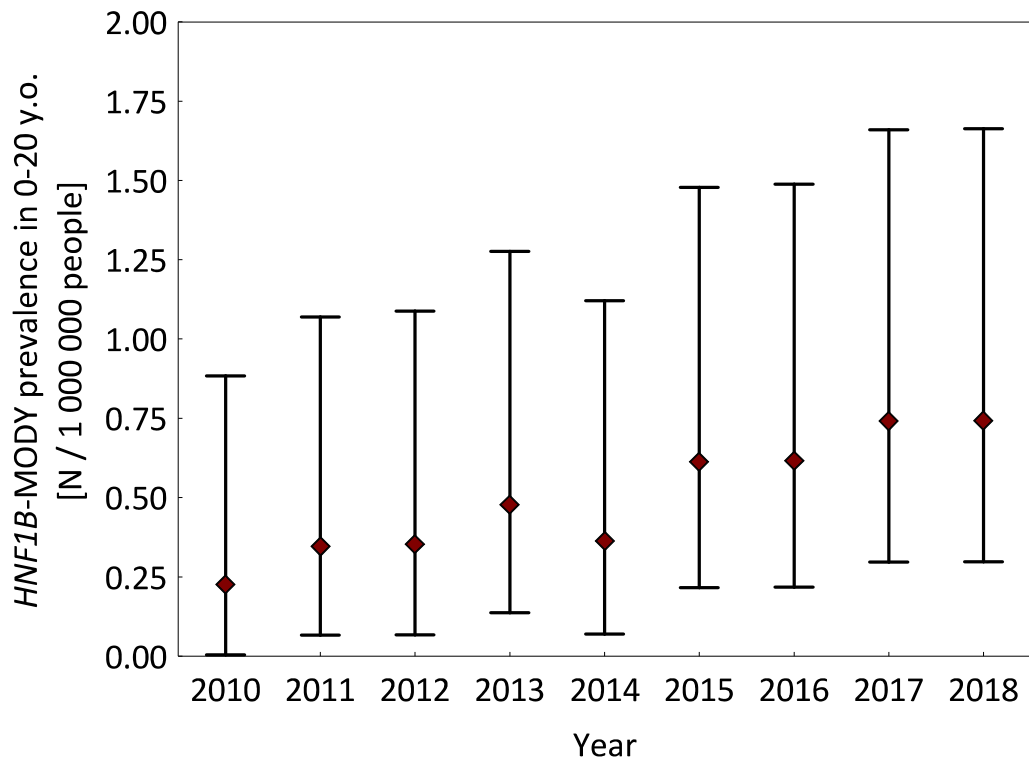

*Supplementary Figure 1. HNF1B-MODY prevalence in Polish population below 20 years of age - estimated based on the Polish Monogenic Diabetes Registry. Diamonds mark prevalence for a given year and whiskers span over 95% confidence intervals. Owing to the growing awareness of referring physicians, an increasing number of patients is identified and diagnosed every year ( $r=0.95$ ,  $p<0.0001$ ).*
