# Supplementary material for: A cross‐sectional study of patients referred for HNF1B‐MODY genetic testing due to cystic kidneys and diabetes
Source: PubMed Central journal article supplement — Pediatr Diabetes. 2020 Jan 29;21(3):422–30. doi: 10.1111/pedi.12959 (PMC7217165; doi:10.1111/pedi.12959), 2020-01-29
Supplement: PEDI-21-422-s003.pdf [file PEDI-21-422-s003.pdf]

Supplementary Table 2

Supplementary Table 2. Summary of phenotype-related non-*HNF1B* genetic findings. All variants were assessed according to the criteria issued by the American College of Medical Genetics and Genomics and the Association for Molecular Pathology. PVS-very strong evidence of pathogenicity; PS – strong evidence; PM-moderate; PP-supportive. Numbers indicate specific ACMG criteria.<sup>13</sup>

| Carrier ID | Gene          | GRCh37 coordinates | Nucleotide change     | Protein change           | Classification    | Evidence |    |     |     | PMID                     |
|------------|---------------|--------------------|-----------------------|--------------------------|-------------------|----------|----|-----|-----|--------------------------|
|            |               |                    |                       |                          |                   | PVS      | PS | PM  | PP  |                          |
| 14         | <i>GCK</i>    | 7:44191965 T/A     | NM_000162.5 c.268A>T  | NP_000153.1 p.Lys90Ter   | pathogenic        | 1        |    | 2   | 3   |                          |
| 24         | <i>PKD1</i>   | 16:2155969 C/T     | NM_000296.4 c.7760G>A | NP_000287.3 p.Trp2587Ter | pathogenic        | 1        |    | 2   | 3   |                          |
| 12         | <i>HNF4A</i>  | 20:43042349 G/A    | NM_000457.4 c.401G>A  | NP_000448.3 p.Arg134Gln  | likely pathogenic |          |    | 1,2 | 3,5 | <a href="#">18356407</a> |
| 35         | <i>KCNJ11</i> | 11:17408648 A/G    | NM_000525.3 c.991T>C  | NP_000516.3 p.Ser331Pro  | uncertain         |          |    | 2   | 2,3 | <a href="#">29207974</a> |
